# Supplementary material for: The Evolutionary Consequences of Transposon-Related Pericentromer Expansion in Melon
Source: PubMed Central journal article supplement — Genome Biol Evol. 2018 Jun 13;10(6):1584–95. doi: 10.1093/gbe/evy115 (PMC6009578; doi:10.1093/gbe/evy115), 2018-06-13
Supplement: evy115_supplementarytable_2.pdf [file evy115_supplementarytable_2.pdf]

**Supplementary Table 2**

Many-to-one orthologous groups (melon-cucumber) which includes melon genes distributed in both gene-rich and gene-poor regions. Orthologous groups are sorted by the location of the closest relative and most distant relative in melon in each orthology group.

| <i>C.sativus</i> protein | Num.Melon Orthologues | Closest relative in Melon |            |        | Most distant relative in melon |            |        |
|--------------------------|-----------------------|---------------------------|------------|--------|--------------------------------|------------|--------|
|                          |                       | Melon Protein             | % identity | Region | Melon Protein                  | % identity | Region |
| Cucsa.012530             | 4                     | MELO3C020176              | 25,4       | Poor   | MELO3C018205                   | 15,2       | Poor   |
| Cucsa.140420             | 22                    | MELO3C003264              | 32,5       | Poor   | MELO3C024806                   | 15,7       | Poor   |
| Cucsa.340910             | 3                     | MELO3C025825              | 61,4       | Poor   | MELO3C025837                   | 35,5       | Poor   |
| Cucsa.011610             | 2                     | MELO3C013106              | 10,2       | Poor   | MELO3C019604                   | 8,5        | Rich   |
| Cucsa.060320             | 2                     | MELO3C008599              | 23,1       | Poor   | MELO3C004674                   | 8,7        | Rich   |
| Cucsa.076550             | 2                     | MELO3C026812              | 19,8       | Poor   | MELO3C021996                   | 14,5       | Rich   |
| Cucsa.077310             | 2                     | MELO3C008446              | 83,7       | Poor   | MELO3C011965                   | 24,5       | Rich   |
| Cucsa.078810             | 2                     | MELO3C024135              | 89,9       | Poor   | MELO3C006036                   | 20,9       | Rich   |
| Cucsa.087600             | 2                     | MELO3C019359              | 79,7       | Poor   | MELO3C013431                   | 47         | Rich   |
| Cucsa.119800             | 2                     | MELO3C012786              | 28,7       | Poor   | MELO3C021826                   | 21,1       | Rich   |
| Cucsa.129270             | 2                     | MELO3C018218              | 30,9       | Poor   | MELO3C003182                   | 30,7       | Rich   |
| Cucsa.136390             | 2                     | MELO3C008263              | 96,1       | Poor   | MELO3C025138                   | 32,9       | Rich   |
| Cucsa.144420             | 2                     | MELO3C023783              | 19,5       | Poor   | MELO3C006987                   | 13,7       | Rich   |
| Cucsa.200290             | 2                     | MELO3C013546              | 29,1       | Poor   | MELO3C024181                   | 23,5       | Rich   |
| Cucsa.365260             | 2                     | MELO3C011587              | 96,1       | Poor   | MELO3C011304                   | 94,7       | Rich   |
| Cucsa.011650             | 10                    | MELO3C026022              | 27,8       | Rich   | MELO3C020473                   | 5,9        | Poor   |
| Cucsa.011930             | 5                     | MELO3C008787              | 65,1       | Rich   | MELO3C024808                   | 33,1       | Poor   |
| Cucsa.032230             | 2                     | MELO3C008502              | 86,8       | Rich   | MELO3C011670                   | 51,2       | Poor   |
| Cucsa.042720             | 2                     | MELO3C014176              | 90,1       | Rich   | MELO3C020402                   | 45         | Poor   |
| Cucsa.053320             | 2                     | MELO3C013181              | 30,3       | Rich   | MELO3C019088                   | 26,9       | Poor   |
| Cucsa.059730             | 2                     | MELO3C025416              | 36,7       | Rich   | MELO3C025413                   | 31,2       | Poor   |
| Cucsa.065380             | 2                     | MELO3C014616              | 73,9       | Rich   | MELO3C003056                   | 50,4       | Poor   |
| Cucsa.075580             | 2                     | MELO3C011879              | 94,3       | Rich   | MELO3C023183                   | 24,4       | Poor   |
| Cucsa.085760             | 2                     | MELO3C002451              | 75,9       | Rich   | MELO3C008541                   | 37,3       | Poor   |
| Cucsa.094560             | 2                     | MELO3C017692              | 66,3       | Rich   | MELO3C025519                   | 22,4       | Poor   |
| Cucsa.102250             | 6                     | MELO3C016058              | 86         | Rich   | MELO3C014811                   | 71,2       | Poor   |
| Cucsa.117100             | 2                     | MELO3C004630              | 79,6       | Rich   | MELO3C021000                   | 18,3       | Poor   |
| Cucsa.148160             | 3                     | MELO3C008658              | 87,6       | Rich   | MELO3C019005                   | 38,6       | Poor   |
| Cucsa.148820             | 2                     | MELO3C018843              | 80,6       | Rich   | MELO3C021011                   | 65,2       | Poor   |
| Cucsa.173650             | 2                     | MELO3C005017              | 27,3       | Rich   | MELO3C005020                   | 25,2       | Poor   |
| Cucsa.395750             | 2                     | MELO3C010818              | 94         | Rich   | MELO3C023799                   | 23,1       | Poor   |
| Cucsa.197070             | 5                     | MELO3C017108              | 86,1       | Rich   | MELO3C022843                   | 34,6       | Poor   |
| Cucsa.244370             | 2                     | MELO3C019684              | 55,9       | Rich   | MELO3C014990                   | 55,5       | Poor   |
| Cucsa.248490             | 2                     | MELO3C016570              | 48         | Rich   | MELO3C025182                   | 21,8       | Poor   |
| Cucsa.252380             | 2                     | MELO3C006733              | 98,3       | Rich   | MELO3C025002                   | 65,6       | Poor   |

SuppTable02

|              |    |              |      |      |              |      |      |
|--------------|----|--------------|------|------|--------------|------|------|
| Cucsa.253740 | 2  | MELO3C006590 | 87,8 | Rich | MELO3C008570 | 32,2 | Poor |
| Cucsa.273840 | 2  | MELO3C016139 | 98,2 | Rich | MELO3C003004 | 40,8 | Poor |
| Cucsa.284960 | 2  | MELO3C012107 | 88,4 | Rich | MELO3C008942 | 23,6 | Poor |
| Cucsa.292690 | 2  | MELO3C002415 | 19,8 | Rich | MELO3C026138 | 19,8 | Poor |
| Cucsa.298370 | 2  | MELO3C018012 | 84,7 | Rich | MELO3C008444 | 32,2 | Poor |
| Cucsa.312370 | 2  | MELO3C003482 | 98,2 | Rich | MELO3C024804 | 43   | Poor |
| Cucsa.313670 | 2  | MELO3C003343 | 64,8 | Rich | MELO3C008643 | 15,2 | Poor |
| Cucsa.350920 | 2  | MELO3C010238 | 93,8 | Rich | MELO3C004727 | 30,9 | Poor |
| Cucsa.353930 | 2  | MELO3C023027 | 68,2 | Rich | MELO3C003066 | 67,5 | Poor |
| Cucsa.360370 | 4  | MELO3C012519 | 35,9 | Rich | MELO3C004872 | 28   | Poor |
| Cucsa.383510 | 2  | MELO3C023012 | 100  | Rich | MELO3C003258 | 73,1 | Poor |
| Cucsa.385210 | 3  | MELO3C021433 | 87,4 | Rich | MELO3C008584 | 33,5 | Poor |
| Cucsa.391600 | 45 | MELO3C026035 | 24,2 | Rich | MELO3C015074 | 11,4 | Poor |
| Cucsa.178230 | 36 | MELO3C016610 | 17,6 | Rich | MELO3C016072 | 13,3 | Rich |
| Cucsa.078850 | 3  | MELO3C004976 | 25,2 | Rich | MELO3C005119 | 17,3 | Rich |
| Cucsa.124200 | 4  | MELO3C014257 | 87,2 | Rich | MELO3C023933 | 25,1 | Rich |
| Cucsa.147940 | 3  | MELO3C018762 | 98   | Rich | MELO3C013481 | 65,6 | Rich |
| Cucsa.164770 | 4  | MELO3C014092 | 44   | Rich | MELO3C015168 | 24,3 | Rich |
| Cucsa.192370 | 3  | MELO3C003925 | 45,7 | Rich | MELO3C017310 | 29,9 | Rich |
| Cucsa.306730 | 4  | MELO3C009356 | 66,5 | Rich | MELO3C011893 | 18,1 | Rich |
| Cucsa.384970 | 4  | MELO3C003289 | 37,7 | Rich | MELO3C015683 | 9,5  | Rich |
